# Supplementary material for: High, in Contrast to Low Levels of Acute Stress Induce Depressive-like Behavior by Involving Astrocytic, in Addition to Microglial P2X7 Receptors in the Rodent Hippocampus
Source: MDPI journal article supplement (doi:10.3390/ijms23031904), 2022-02-08
Supplement: s1 [file s1]

**Supplementary Table S1** Manipulations during a 4 week exposure of mice to unpredictable chronic mild stress (CUMS).

|       | time    | Monday      | Tuesday                               | Wednesday                  | Thursday                             | Friday                              | Saturday            | Sunday                          |  |  |
|-------|---------|-------------|---------------------------------------|----------------------------|--------------------------------------|-------------------------------------|---------------------|---------------------------------|--|--|
| week1 | 8 a.m.  |             |                                       |                            |                                      |                                     | altered light cycle | altered light cycle+wet bedding |  |  |
|       | 9 a.m.  |             |                                       |                            |                                      |                                     |                     |                                 |  |  |
|       | 10 a.m. |             |                                       | food and water deprivation | cage tilt+ no bedding                | wet bedding                         |                     |                                 |  |  |
|       | 11 a.m. |             |                                       |                            |                                      |                                     |                     |                                 |  |  |
|       | 12 a.m. |             | restraint (0.5 h)                     |                            |                                      |                                     |                     |                                 |  |  |
|       | 1 p.m.  |             |                                       |                            |                                      |                                     |                     |                                 |  |  |
|       | 2 p.m.  |             |                                       |                            | forced bath                          |                                     |                     |                                 |  |  |
|       | 3 p.m.  |             |                                       |                            |                                      | no bedding overnight                | social stress       | no bedding overnight            |  |  |
|       | 4 p.m.  |             |                                       |                            |                                      |                                     |                     |                                 |  |  |
| week2 | 8 a.m.  |             |                                       |                            |                                      |                                     |                     |                                 |  |  |
|       | 9 a.m.  |             |                                       |                            |                                      |                                     |                     |                                 |  |  |
|       | 10 a.m. |             |                                       | cage tilt+wet bedding      |                                      | altered light cycle                 | restraint (0.5h )   |                                 |  |  |
|       | 11 a.m. |             |                                       |                            |                                      |                                     |                     |                                 |  |  |
|       | 12 a.m. | cage tilt   |                                       |                            |                                      |                                     |                     |                                 |  |  |
|       | 1 p.m.  |             |                                       |                            |                                      |                                     |                     |                                 |  |  |
|       | 2 p.m.  |             |                                       |                            |                                      |                                     |                     |                                 |  |  |
|       | 3 p.m.  |             |                                       | foot shock+wet bedding     | cage tilt+food and water deprivation | social stress+wet bedding overnight |                     | no bedding overnight            |  |  |
|       | 4 p.m.  | forced bath |                                       |                            |                                      |                                     |                     |                                 |  |  |
| week3 | 8 a.m.  |             |                                       |                            |                                      |                                     |                     |                                 |  |  |
|       | 9 a.m.  |             |                                       |                            | wet bedding                          |                                     |                     | cage tilt+altered light cycle   |  |  |
|       | 10 a.m. |             |                                       |                            |                                      |                                     |                     |                                 |  |  |
|       | 11 a.m. | forced bath | cage tilt+ food and water deprivation | altered light cycle        |                                      |                                     |                     |                                 |  |  |
|       | 12 a.m. |             |                                       |                            |                                      | forced bath                         |                     |                                 |  |  |
|       | 1 p.m.  |             |                                       |                            |                                      |                                     |                     |                                 |  |  |
|       | 2 p.m.  |             |                                       |                            | foot shock+noise( 120 Hz)            | no bedding                          |                     | noise (120 Hz)                  |  |  |
|       | 3 p.m.  |             |                                       |                            |                                      |                                     |                     |                                 |  |  |
|       | 4 p.m.  |             |                                       |                            |                                      |                                     |                     |                                 |  |  |
| week4 | 9 a.m.  |             |                                       |                            |                                      |                                     | altered light cycle |                                 |  |  |
|       | 10 a.m. |             |                                       |                            | cage tilt+wet bedding                | forced bath                         |                     |                                 |  |  |
|       | 11 a.m. |             |                                       |                            |                                      |                                     |                     |                                 |  |  |
|       | 12 a.m. | wet bedding | restraint (0.5 h)                     |                            |                                      |                                     |                     |                                 |  |  |
|       | 1 p.m.  |             |                                       |                            |                                      |                                     | noise(120Hz)        |                                 |  |  |
|       | 2 p.m.  |             |                                       |                            |                                      |                                     |                     |                                 |  |  |
|       | 3 p.m.  |             |                                       |                            |                                      | no bedding                          |                     |                                 |  |  |
|       | 4 p.m.  |             | no bedding overnight                  |                            | food and water deprivation           |                                     |                     |                                 |  |  |
